# Supplementary material
Source: PubMed Central journal article supplement (PMC7702273)
Supplement: NIHPP2020.08.13.250217-supplement-1.pdf [file NIHPP2020.08.13.250217-supplement-1.pdf]

## Supplemental Figures

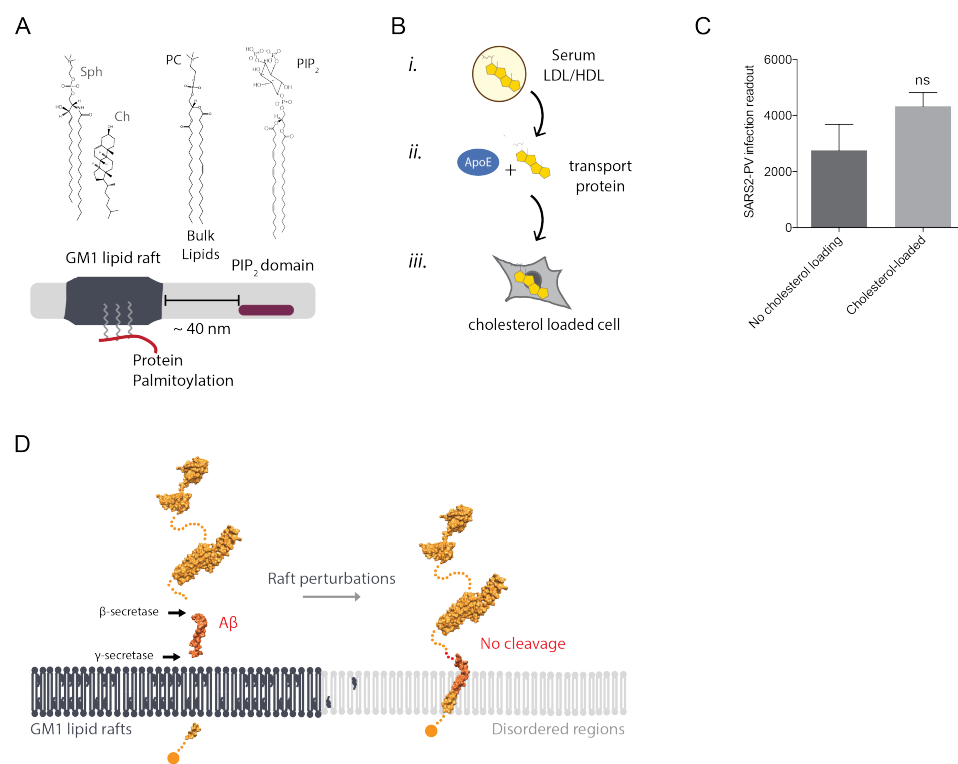

**Fig. S1. Membrane heterogeneity.** (A) GM1 rafts are clusters of saturated known as liquid ordered ( $L_o$ ) and commonly reside separate from liquid disordered ( $L_d$ ) phases<sup>62</sup>. The ordered phase ( $L_o$ ) is generally enriched in sphingomyelin and cholesterol whereas the disordered ( $L_d$ ) phase consists of unsaturated lipids and includes polyunsaturated lipids like PA and PIP<sub>2</sub><sup>64</sup>. (B) Cartoon diagram showing the experimental setup for loading cultured cells with cholesterol. *i.*, Cholesterol (yellow shading) loaded into lipoprotein (e.g., low- and high-density lipoprotein (LDL and HDL respectively)) from blood serum. *ii.*, Cholesterol free human apolipoprotein E (apoE, brown shading), a cholesterol transport protein, is exposed to cholesterol from blood serum and *iii.*, ApoE transports cholesterol into of cells (grey shading). (C) SARS2-PV entry in ACE2 overexpressing HEK293T cells without and with cholesterol loading indicated by raw luciferase activity readout. Data are expressed as mean  $\pm$  s.e.m., unpaired t-test,  $n=4$ . (D) Model of HCQ and anesthetics translocating APP from GM1 rafts to disordered regions through raft perturbation to reduce the synthesis of A $\beta$ .

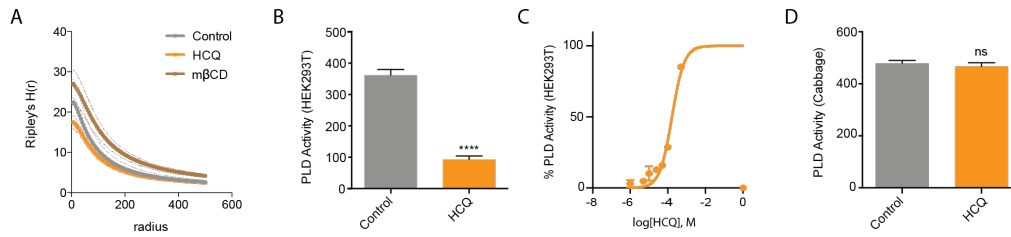

**Fig. S2. HCQ displacement of PLD2 from lipid rafts. (A)** Ripley's H-Function (H(r)) showing raft separation. **(B)** HCQ (50 $\mu$ M) decreased PLD activity in PLD assay. Data are expressed as mean  $\pm$  s.e.m., \*\*\*\*P  $\leq$  0.0001, unpaired t test, n=6. **(C)** A dose response of HCQ's inhibition to PLD activity in PLD assay, n=3. **(D)** Effect of HCQ(50 $\mu$ M) on PLD activity in cabbage PLD assay is not significant, unpaired t test, n=4-5.

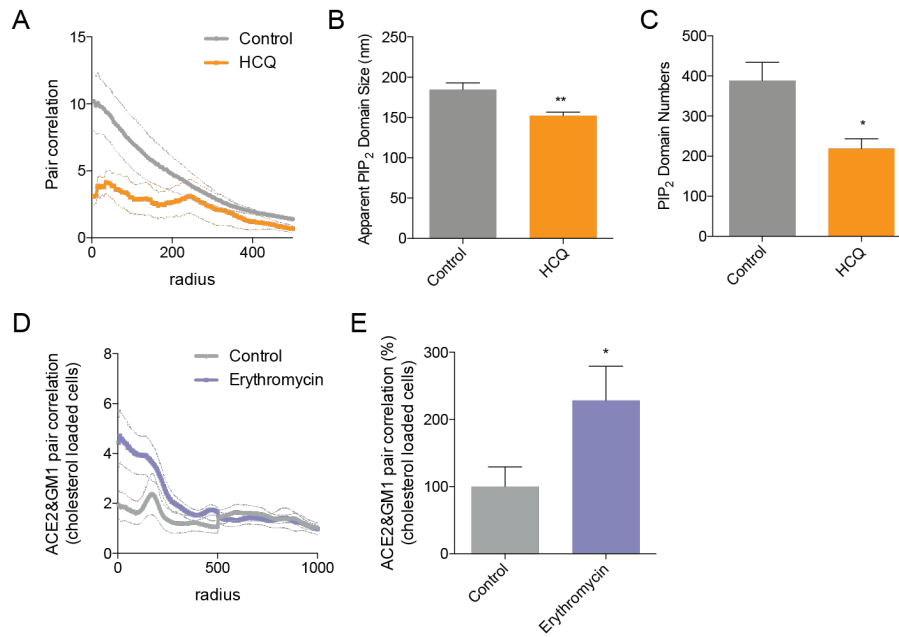

**Fig. S3. dSTORM of PIP<sub>2</sub> domains.** (A) Pair correlation analysis of dSTORM imaging (Fig. 3C). HCQ treatment decreased association of ACE2 and PIP<sub>2</sub>. (B-C) Bar graph of the apparent raft diameter analyzed by DBSCAN cluster analysis. HCQ decreases both raft diameter (B) and number (C) of PIP<sub>2</sub> domains. Data are expressed as mean  $\pm$  s.e.m., \*P  $\leq$  0.05, \*\*P  $\leq$  0.01, one-way ANOVA, n=5-6. (D-E) Pair correlation (D) and percent of pair correlation calculated at short distances (0-5 nm) (E) of dSTORM imaging. Erythromycin treatment decreased association of ACE2 with GM1 rafts. Data are expressed as mean  $\pm$  s.e.m., \*P  $\leq$  0.05, \*\*P  $\leq$  0.01, unpaired t test, n=10.
